# Supplementary material for: Catalytic activity of Cu–cysteine coated on Ti3C2MXene toward peroxymonosulfate activation for carbamazepine degradation
Source: Royal Society of Chemistry journal article supplement (doi:10.1039/d4en00342j), 2024-01-01
Supplement: d4en00342j1.pdf [file d4en00342j1.pdf]

## **Catalytic activity of Cu-cysteine coated on Ti<sub>3</sub>C<sub>2</sub>MXene toward peroxymonosulfate activation for carbamazepine degradation**

Pascaline Sanga,<sup>a,b</sup> Haitham Saad Al-mashriqi,<sup>a,b</sup> Jing Xiao,<sup>a,b</sup> Jia Chen <sup>a\*</sup> and  
Hongdeng Qiu <sup>a,b, c\*</sup>

<sup>a</sup> CAS Key Laboratory of Chemistry of Northwestern Plant Resources and Key Laboratory for Natural Medicine of Gansu Province, Lanzhou Institute of Chemical Physics, Chinese Academy of Sciences, Lanzhou 730000, China.

<sup>b</sup> University of Chinese Academy of Sciences, Chinese Academy of Sciences, Beijing 100039, China.

<sup>c</sup> Key Laboratory of Rare Earths, Ganjiang Innovation Academy, Chinese Academy of Sciences, Ganzhou 341000, China

\* Corresponding e-mail: [jiachen@licp.cas.cn](mailto:jiachen@licp.cas.cn) (J. Chen), [hdqiu@licp.cas.cn](mailto:hdqiu@licp.cas.cn) (H. Qiu).

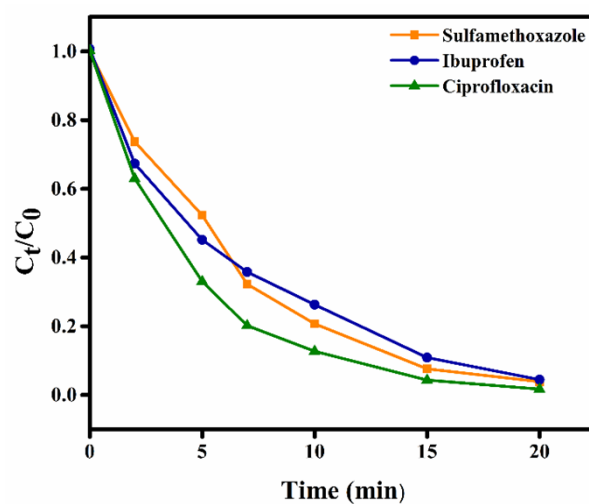

**Fig S1:** Degradation efficiency of various pharmaceutical pollutants.

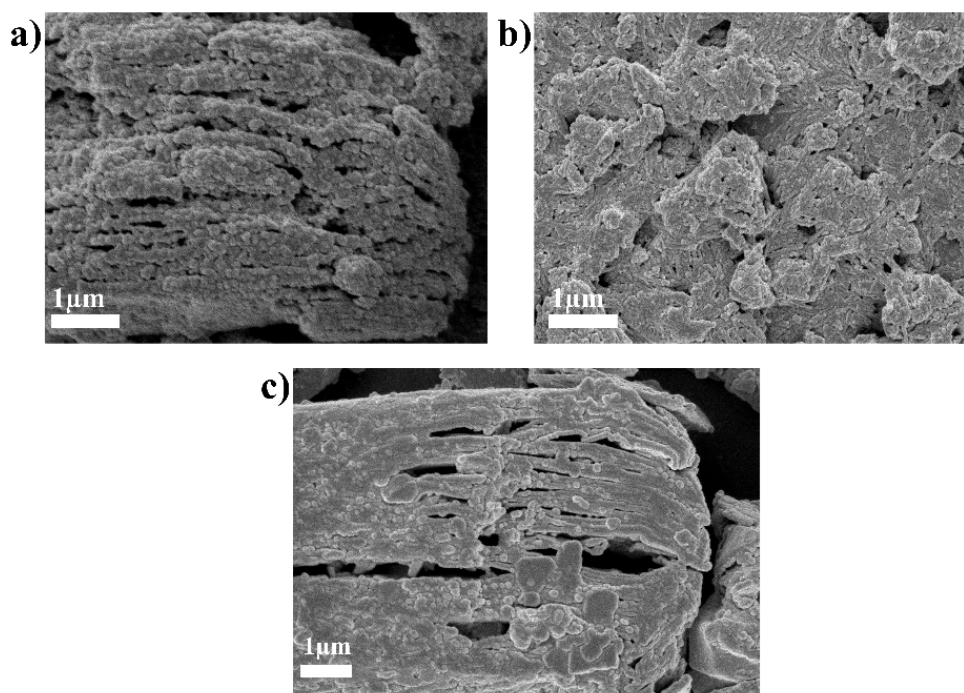

**Fig S2.** FESEM of the prepared a) Co-cy/MXene, b) Fe-cy/MXene, and c) Mn-cy/MXene.

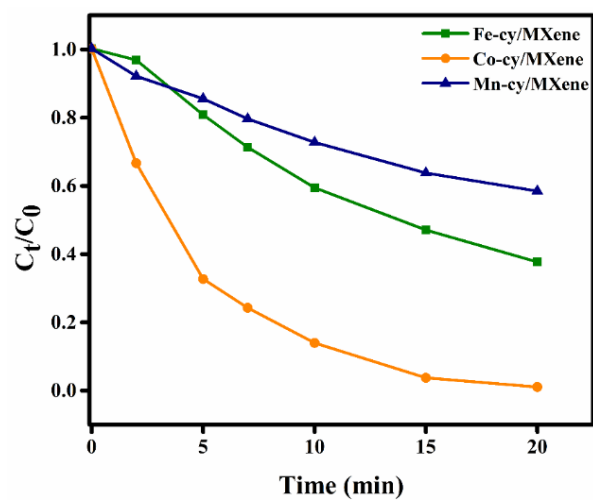

**Fig. S3.** Removal efficiency of CBZ with different transition metal-cy/MXene catalysts. Reaction conditions: [CBZ] = 10 mg/L, [PMS] = 0.12 g/L, catalyst = 0.2 g/L, pH 7.0.

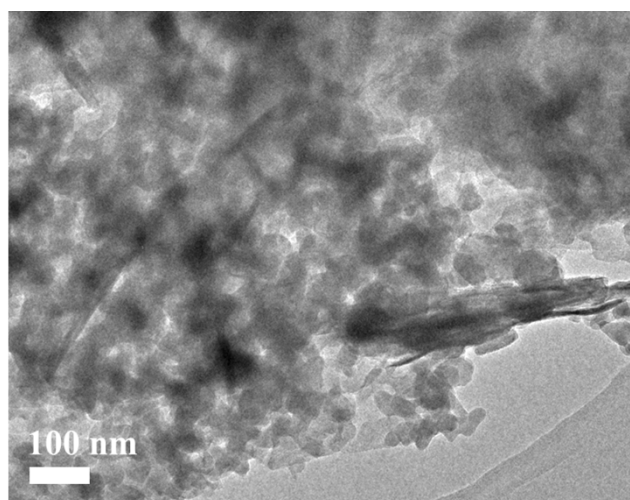

**Fig S4.** TEM of CCM after four reuse cycles.

**Table S1.** HPLC conditions for different pollutants

| <b>Compounds</b> | <b>Mobile phase</b>                        | <b>Flow rate<br/>(mL/min)</b> | <b>Wavelength<br/>(nm)</b> |
|------------------|--------------------------------------------|-------------------------------|----------------------------|
| Carbamazepine    | Acetonitrile:60%<br>Water: 40%             | 1                             | 286                        |
| Ibuprofen        | Acetonitrile: 40%<br>0.1% Acetic acid: 60% | 0.5                           | 222                        |
| Sulfamethoxazole | Methanol: 70%<br>0.2% Acetic acid: 30%     | 1                             | 264                        |
| Ciprofloxacin    | Acetonitrile:40%<br>Water: 60%             | 1<br>1                        | 275                        |

**Table S2.** Comparison of CCM catalyst to activate PMS with other catalysts for the degradation of CBZ.

|                                           | <b>CBZ</b>                 | <b>Degradation efficiency</b> | <b>Time (min)</b> | <b>Catalyst dosage</b> | <b>PMS dosage</b>   | <b>pH</b> | <b>Reference</b> |
|-------------------------------------------|----------------------------|-------------------------------|-------------------|------------------------|---------------------|-----------|------------------|
| CuO/MXene                                 | 10 mg/L                    | 95.88%                        | 20                | 0.6 g/L                | 2 mM                | 7         | [1]              |
| CZIF                                      | 5 ppm                      | 96.8%                         | 25                | 0.05 g/L               | 0.4 mM              | 5.8       | [2]              |
| Co-CA                                     | 20 mg/L                    | 95.3%                         | 20                | 0.1 g/L                | 0.3 g/L             | 6.38      | [3]              |
| CoSBC                                     | 20 mg/L                    | 95.73%                        | 20                | 0.10 g/L               | 0.30 g/L            | 6.38      | [4]              |
| AgBr/BiOBr/Fe <sub>3</sub> O <sub>4</sub> | 10 mg/L                    | 96.84%                        | 30                | 0.30 g/L               | 1.0 mM              |           | [5]              |
| NMS                                       | 5 mg/L                     | 70%                           | 120               | 0.4 g/L                | 0.3 g/L             | 6.5       | [6]              |
| FeMATNPc-INA                              | 2.5×10 <sup>-5</sup> mol/L | 98%                           | 40                | 1 g/L                  | 1.5 mmol/L          | 7         | [7]              |
| CCM                                       | 10 mg/l                    | 98.6%                         | 20                | 0.2 g/L                | 0.2 mM<br>(0.12g/L) | 7         | This work        |

CZIF: ZIF-derived Co, N-doped graphitic carbon

Co-CA: Cobalt-embedded carbon aerogels

CoSBC: CoS<sub>x</sub> containing biochar

NMS: Natural manganese sand enriched with oxygen vacancies

FeMATNPc-INA: Monoaminotrinitro iron phthalocyanine connect with isonicotinic acid

CCM: Cu-cysteine/Ti<sub>3</sub>C<sub>2</sub>MXene

## References

- [1] P. Yang, S. Li, L. Xiaofu, A. Xiaojing, D. Liu, W. Huang, Singlet oxygen-dominated activation of peroxymonosulfate by CuO/MXene nanocomposites for efficient decontamination of carbamazepine under high salinity conditions: Performance and singlet oxygen evolution mechanism, *Sep. Purif. Technol.* 285 (2022) 120288. <https://doi.org/10.1016/j.seppur.2021.120288>.
- [2] J. Zhang, J. Wei, Z. Xiong, Z. Guo, D. Xu, B. Lai, Coupled adsorption and non-radical dominated mechanisms in Co, N-doped graphite via peroxymonosulfate activation for efficiently degradation of carbamazepine, *Sep. Purif. Technol.* 309 (2023) 122981. <https://doi.org/10.1016/j.seppur.2022.122981>.
- [3] C. Yao, Y. Qin, Y. Li, Q. An, Z. Xiao, C. Wang, S. Zhai, Activation of peroxymonosulfate by cobalt-embedded carbon aerogels: Preparation and singlet oxygen-dominated catalytic degradation insight, *Sep. Purif. Technol.* 307 (2023) 122728. <https://doi.org/10.1016/j.seppur.2022.122728>.
- [4] X. Peng, Y. Li, K. Zhu, Q. An, J. Hao, Z. Xiao, X. Dong, S. Zhai, CoS produced in Porphyra biochar by exogenous Co and endogenous S doping to enhance peroxymonosulfate activation for carbamazepine degradation, *J. Environ. Chem. Eng.* 11(5) (2023) 110988. <https://doi.org/10.1016/j.jece.2023.110988>.
- [5] Y. Tao, G. Fan, X. Li, X. Cao, B. Du, H. Li, J. Luo, Z. Hong, K.-Q. Xu, Recyclable magnetic AgBr/BiOBr/Fe<sub>3</sub>O<sub>4</sub> photocatalytic activation peroxymonosulfate for carbamazepine degradation: Synergistic effect and mechanism, *Sep. Purif. Technol.* 330 (2024) 125392. <https://doi.org/10.1016/j.seppur.2023.125392>.
- [6] W. Liu, Y. Yang, Y. Li, Y. Zhou, C. Wang, Y. Zhou, J. Shang, X. Cheng, Oxygen vacancies enhanced natural manganese sand activation by PMS for CBZ degradation: Intermediate toxicity and DFT calculations, *Sep. Purif. Technol.* 329 (2024) 125015. <https://doi.org/10.1016/j.seppur.2023.125015>.
- [7] Z. Zhu, W. Qian, Z. Shang, X. Ma, Z. Wang, W. Lu, W. Chen, Efficient elimination of carbamazepine using polyacrylonitrile-supported pyridine bridged iron phthalocyanine nanofibers by activating peroxymonosulfate in dark condition, *J. Environ. Sci.* 137 (2024) 224-236. <https://doi.org/10.1016/j.jes.2022.10.046>.
